# Supplementary material for: Stabilizing bijels using a mixture of fumed silica nanoparticles
Source: Royal Society of Chemistry journal article supplement (doi:10.1039/c5cc07346d), 2015-01-01
Supplement: c5cc07346d1.pdf [file c5cc07346d1.pdf]

## Supplementary Information (SI)

### Stabilizing bijels using a mixture of fumed silica nanoparticles

Dongyu Cai, and Paul S. Clegg

School of Physics and Astronomy, University of Edinburgh, Edinburgh EH9 3FD, UK

Corresponding authors D. Cai ([dongyu.cai@hotmail.com](mailto:dongyu.cai@hotmail.com)) and P. S. Clegg ([paul.clegg@ed.ac.uk](mailto:paul.clegg@ed.ac.uk))

#### 1. Silanization of H30 fumed silica particles

H30 silica particles were chemically modified using hexamethyldisilazane (HMDS) following the procedure described below: 0.5g H30, 0.2g HMDS and 2g ammonia solution were mixed together in 15g ethanol. The mixture was subjected to vortex mixing for 10 seconds, then sonicated in a VWR ultrasonic bath for half an hour. The silanization process continued for 20h at room temperature. The HMDS-modified particles were washed several times using ethanol; the wet particles were then dried at 50°C for 24h before use.

#### 2. Avoiding crystallization

The ethylene carbonate-rich (EC-rich) phase in the bijel should, in principle, crystallize when the temperature is lower than about 30°C. However, crystallization is not immediate. The lower temperature is, the faster EC-rich phase becomes solid. In practice, the bijel remains liquid for several hours at room temperature, which allows us to perform confocal imaging in a straightforward manner.

In the experiments, we chose a low quenching temperature (10°C) for the purpose of producing a fast cooling rate; this helps promote spinodal decomposition. The sample is enclosed in a 1mm path length optical cuvette. The single-phase mixture was quenched in the cold bath (10°C) for about 30 seconds, giving bijels such as that presented in Figure 1. We observed that the EC-rich phase would crystallize when the mixture was placed in the cold bath for about 2 minutes. Crystallization caused clear damage to bijel structures, which is immediately evident in confocal images (data not shown).

#### 3. Particle wettability

Screening the wettability of H30, R972 and R812 fumed silica particles was carried out by simply shaking the mixture with equal volumes of EC-rich and xylene-rich phases. The continuous phase of the resulting emulsion is the liquid which wets the particle surfaces most readily.

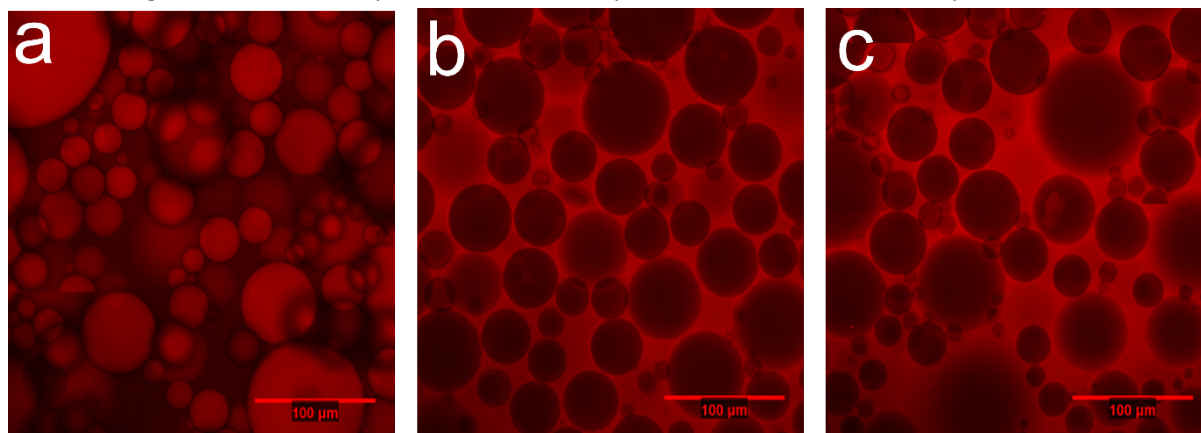

Figure S1 showing confocal images of the emulsions stabilized by 0.4vol% (a) H30, (b) R972 and (c) R812 fumed silica particles. The xylene-rich phase with Nile Red is shown as the red region in the confocal images

#### 4. Formation of EC/xylene bijels

Ethylene carbonate (EC), p-xylene and treated particles (or particle mixtures) were added to a glass vial. The molar ratio of EC and p-xylene was fixed at 45/55 (mol/mol) according to the phase diagram in Figure 2. After heating up to 100°C on a hot plate, the mixture of EC and xylene in the single-fluid phase was quickly sonicated by a tip ultrasound at a power of 5 watts for 10 seconds. Phase separation was avoided due to the heat generated by sonication. Then the mixture was quickly transferred to a glass cuvette preheated at 100°C. Finally, the hot glass cuvette was quenched in a cold water bath (10°C). The imaging was performed by confocal microscopy using a Zeiss Observer.Z1 inverted microscope in conjunction with a Zeiss LSM 700 scan head and a 20× 0.4 NA air objective or a 40× 1.3 oil objective. The fluorescent dye, Nile Red, was added to the xylene-rich phase and excited with a 488 nm laser line. Though we observed partitioning of Nile Red into both EC and xylene-rich phases, careful selection of emission filters allowed separate imaging of the xylene-rich phase (red region in Figure S1). Note: the xylene-rich phase in the bijel was deliberately labelled as grey for ease of visualization.
